# Supplementary material
Source: PubMed Central journal article supplement (PMC2796737)
Supplement: supp_180_12_1271__1.pdf [file supp_180_12_1271__1.pdf]

**HIV infection does not affect active case finding of tuberculosis in South African gold miners.**

**Authors:** James J. Lewis, Salome Charalambous, John H. Day, Katherine L. Fielding, Alison D. Grant, Richard J. Hayes, Elizabeth L. Corbett, Gavin J. Churchyard

**Online Data Supplement**

**Table E1**

TB in SA miners - combined HIV+ and HIV (-)

| Radiological findings |                       | TB cases | Denominator | % TB  |
|-----------------------|-----------------------|----------|-------------|-------|
| Silicosis             | Tuberculosis          |          |             |       |
| None                  | New/changing features |          |             |       |
|                       | No                    | 23       | 1399        | 1.6%  |
|                       | Yes                   | 10       | 19          | 52.6% |
|                       | Total                 | 33       | 1418        | 2.3%  |
| Early                 | New/changing features |          |             |       |
|                       | No                    | 13       | 354         | 3.7%  |
|                       | Yes                   | 3        | 8           | 37.5% |
|                       | Total                 | 16       | 362         | 4.4%  |
| Advanced              | New/changing features |          |             |       |
|                       | No                    | 2        | 128         | 1.6%  |
|                       | Yes                   | 0        | 9           | 0.0%  |
|                       | Total                 | 2        | 137         | 1.5%  |
| Missing               | New/changing features |          |             |       |
|                       | No                    | 0        | 36          | 0.0%  |
|                       | Yes                   | 0        | 2           | 0.0%  |
|                       | Total                 | 0        | 38          | 0.0%  |
| TOTAL                 | New/changing features |          |             |       |
|                       | No                    | 38       | 1917        | 2.0%  |
|                       | Yes                   | 13       | 38          | 34.2% |
|                       | Total                 | 51       | 1955        | 2.6%  |
